1 **Knockdown of GAS5 restores ox-LDL-induced impaired autophagy flux**  
2 **via upregulating miR-26a in human endothelial cells**

3

4 Weijie Liang<sup>1,2</sup>, Taibing Fan<sup>1,2</sup>, Lin Liu<sup>1,2</sup>, Lianzhong Zhang<sup>1,2,\*</sup>

5

6 <sup>1</sup> Department of Cardiovascular surgery, Henan Provincial People's Hospital

7 People's Hospital of Zhengzhou University

8

9 <sup>2</sup> Department of Cardiovascular surgery, Fuwai Cardiovascular Hospital in

10 Central China

11

12 \*Correspondence author: <sup>1</sup>Department of Cardiovascular surgery, Henan

13 Provincial People's Hospital , People's Hospital of Zhengzhou University.

14 <sup>2</sup>Department of Cardiovascular surgery, Fuwai Cardiovascular Hospital in

15 Central China.

16 Tel:+86-0371-58681075

Email: eulbsejin2018@sina.com

17

18

- 19 ox-LDL, Oxidized low-density lipoprotein
- 20 EC, endothelial cell
- 21 GAS5, growth-arrest specific transcript 5
- 22 HAECs, human aortic endothelial cells
- 23 RIP, RNA immunoprecipitation
- 24 ncRNAs, noncoding RNAs
- 25 lncRNA, long noncoding RNA
- 26 miRNA, microRNA
- 27 HFD, high-fat diet
- 28 apoE, apolipoprotein E
- 29 ceRNA, competitive endogenous RNA
- 30 miR-NC, miRNA negative control
- 31 cDNA, complementary DNA
- 32 snRNA, small nuclear RNA
- 33 SDS-PAGE, sodium dodecyl sulfate-polyacrylamide gel
- 34 TBST, Tris-based saline with Tween 20
- 35 RISC, RNA-induced silencing complex
- 36 TSLP, thymic stromal lymphopoietin
- 37 HA-VSMCs, human aorta vascular smooth muscle cells
- 38 CAD, coronary artery disease
- 39

40 **Abstract**

41 **Background:** Oxidized low-density lipoprotein (ox-LDL)-induced endothelial  
42 cell (EC) injury and autophagy dysfunction play a vital role in the development  
43 of atherosclerosis. LncRNAs have been identified to participate in the  
44 regulation of pathogenesis of atherosclerosis. However, it remains largely  
45 undefined whether growth-arrest specific transcript 5 (GAS5) could influence  
46 ox-LDL-induced autophagy dysfunction in ECs.

47 **Methods:** The expressions of GAS5 and miR-26a in the plasma samples of  
48 patients with atherosclerosis and ox-LDL-treated human aortic endothelial  
49 cells (HAECs) were detected by qRT-PCR. Luciferase reporter assay, RNA  
50 immunoprecipitation (RIP), and RNA pull down were performed to validate  
51 whether GAS5 could directly interact with miR-26a. The effects of ox-LDL,  
52 GAS5 or combined with miR-26a on apoptosis and autophagy were evaluated  
53 by flow cytometry analysis and western blot, respectively.

54 **Results:** GAS5 expression was upregulated and miR-26a was downregulated  
55 in the plasma samples of patients with atherosclerosis and ox-LDL-treated  
56 HAECs. There was reciprocal inhibition between GAS5 and miR-26a  
57 expressions in ox-LDL-treated HAECs. We further demonstrated that GAS5  
58 directly interacted with miR-26a in ox-LDL-treated HAECs. Additionally,  
59 ox-LDL administration induced apoptosis and impaired autophagy flux in  
60 HAECs. Rescue experiments demonstrated that GAS5 knockdown restored  
61 ox-LDL-induced impaired autophagy flux by upregulating miR-26a in HAECs.

62 **Conclusion:** Knockdown of GAS5 restores ox-LDL-induced impaired  
63 autophagy flux via upregulating miR-26a in human endothelial cells, revealing

64 a novel regulatory mechanism for ox-LDL-induced impaired autophagy flux in

65 ECs through ceRNA crosstalk.

66 **Key words:** GAS5, miR-26a, ox-LDL, autophagy, HAECs, atherosclerosis

67

68 **Introduction**

69

70 Atherosclerosis, a devastating and chronic multi-factorial vascular  
71 cardiovascular disease, remains a leading health issue among aged people,  
72 accounting for the high morbidity and morbidity of cardiovascular disease  
73 worldwide [1]. It has been suggested that endothelial dysfunction is the  
74 requisite for the progression of atherosclerosis [2]. Oxidized low-density  
75 lipoprotein (ox-LDL) is considered as a key risk factor associated with  
76 endothelial dysfunction in atherosclerosis [3]. Extensive researches within the  
77 past decades have demonstrated that ox-LDL-induced autophagy dysfunction  
78 in endothelial cells (ECs) plays a vital role in the development of  
79 atherosclerosis [4]. Autophagy is well-known as a dynamic process of  
80 recycling that plays a prominent role in degrading dysfunctional or damaged  
81 proteins or intracellular organelles in eukaryotic cells [5]. Recently, increasing  
82 evidence has indicated that impaired autophagy flux contributes to lipid  
83 metabolism dysfunction and EC apoptosis, greatly implicated in vascular  
84 endothelial dysfunction and atherosclerotic plaque development [6]. Therefore,  
85 upregulation of autophagy may be a promising therapy to protect ECs from  
86 ox-LDL-induced injury.

87 Recently, increasing evidence demonstrated that noncoding RNAs  
88 (ncRNAs), including the recently acknowledged long noncoding RNA (lncRNA)  
89 and the well-known microRNA (miRNA), play important roles in the regulation  
90 of gene expression via multiple mechanisms [7]. lncRNAs are generally  
91 defined as a group of RNA transcripts longer than 200 nucleotides with limited  
92 or no protein-coding potential. A wide range of documents unveil that lncRNAs  
93 play important functional roles in the regulation of lipid metabolism, vascular

94 inflammation, cell proliferation, and EC apoptosis, suggesting that lncRNAs  
95 participate in the regulation of pathogenesis of atherosclerosis [8]. lncRNA  
96 growth-arrest specific transcript 5 (GAS5), located at chromosome 1q25.1,  
97 was originally isolated from mouse NIH 3T3 cells using subtraction  
98 hybridization [9]. There is striking evidence that GAS5 functions as a tumor  
99 suppressive lncRNA and is aberrantly downregulated in a variety of human  
100 cancers [10]. Notably, previous studies showed that GAS5 was increased in  
101 the plaque of atherosclerosis collected from patients and animal models and  
102 knockdown of GAS5 reduced the apoptosis of macrophages and vascular  
103 endothelial cells after ox-LDL stimulation [11, 12]. However, it remains largely  
104 undefined whether GAS5 could influence ox-LDL-induced autophagy  
105 dysfunction in ECs.

106 miRNAs are small, endogenous, single-stranded ncRNAs with 20-25  
107 nucleotides in length, which repress gene expression at the posttranscriptional  
108 level via mRNA degradation or translational inhibition. More recently,  
109 substantive studies have demonstrated that miRNAs play critical roles in the  
110 development of atherosclerosis via regulating the proliferation, migration and  
111 apoptosis of various types of cells [13]. miR-26a, a highly conserved miRNA,  
112 has been revealed to play essential roles in development, cell differentiation,  
113 apoptosis and growth. miR-26a is reported to be frequently dysregulated in  
114 cardiovascular diseases such as cardiac hypertrophy and myocardial ischemia  
115 [14, 15]. Moreover, it was previously reported that miR-26a was  
116 downregulated in high-fat diet (HFD)-fed apolipoprotein E (apoE)<sup>-/-</sup> mice and  
117 ox-LDL-stimulated human aortic endothelial cells (HAECs) and miR-26a  
118 overexpression alleviated the development of atherosclerosis [16, 17].

119 Recently, a new regulatory mechanism has been proposed that lncRNAs  
120 function on a competitive endogenous RNA (ceRNA) to regulate the  
121 expressions and biological function of miRNAs [18]. The lncRNA-miRNA  
122 interaction has been identified in various human diseases, including vascular  
123 pathophysiology [19]. Since our bioinformatics analysis demonstrated that  
124 GAS5 contained the complementary binding sites in miR-26a, we  
125 hypothesized whether GAS5 could function as a molecular sponge of miR-26a  
126 to regulate atherosclerosis progression.

127 In the present study, we investigated the effects of GAS5 on  
128 ox-LDL-induced autophagy in HAECs, as well as the interaction between  
129 GAS5 and miR-26a.

## 130 **2. Materials and methods**

### 131 *2.1 Clinical specimens*

132 A total of 30 atherosclerotic patients diagnosed by clinical symptoms and  
133 coronary angiography at the department of cardiology in the Henan Provincial  
134 People's Hospital between January 2015 and August 2016 and 30 healthy  
135 subjects were enrolled in the present study. The plasma samples were  
136 collected from all patients and healthy subjects and stored at -80°C for further  
137 experiments. The study was performed with the approval of the Research  
138 Ethics Committee of Henan Provincial People's Hospital and written informed  
139 consent was obtained from each participant.

### 140 *2.2. Cell culture and transfection*

141 HAECs were obtained from American Type Culture Collection (ATCC,  
142 Manassas, VA, USA) and were cultured in endothelial cell medium containing  
143 endothelial cell growth factors, 10% heat-inactivated fetal bovine serum (FBS,

144 Hyclone, Logan, UT, USA) and 100 U/ml penicillin and 100 µg/ml streptomycin  
145 (Sangon, Shanghai, China) at 37°C in a humidified atmosphere of 5% CO<sub>2</sub>.  
146 Cells in logarithmic phase were collected for further experiments. When grown  
147 to 70-80% confluence, HAECs were transiently transfected with miR-26a  
148 mimic (miR-26a), miRNA negative control (miR-NC), miR-26a inhibitor  
149 (anti-miR-26a), inhibitor negative control (anti-miR-NC), pcDNA-GAS5 (GAS5),  
150 pcDNA empty control (pcDNA), siRNA against GAS5 (si-GAS5), siRNA  
151 negative control (si-NC) (all from RiboBio Co., Ltd., Guangzhou, China) using  
152 Lipofectamine 2000 reagent (Invitrogen, CA, Carlsbad, USA). Following 48 h  
153 of transfection, HAECs were treated with different concentrations of ox-LDL  
154 (0.25, 0.5, and 1 mg/L) (UnionBiol, Beijing, China) for 24 h.

### 155 *2.3. Quantitative real-time PCR*

156 Total RNA was extracted from clinical samples or treated HAECs using TRIzol  
157 reagent (Invitrogen) and complementary DNA (cDNA) was synthesized from 1  
158 µg of total RNA using a High-Capacity cDNA Reverse Transcription kit  
159 (Applied Biosystems, Foster City, CA, USA). The expressions of GAS5 and  
160 miR-26a were examined using a SYBR Premix Ex Taq II (Takara, Dalian,  
161 China) and TaqMan MicroRNA Assay Kit (Applied Biosystems) on a CFX96  
162 real-time PCR System (Bio-Rad, Hercules, CA, USA), respectively. The  
163 expressions of GAS5 and miR-26a were normalized to GAPDH and U6 small  
164 nuclear RNA (snRNA), respectively. The relative gene expression was  
165 calculated using the  $2^{-\Delta\Delta Ct}$  method.

### 166 *2.4. Western blot*

167 Total proteins were extracted from the treated HAECs using RIPA buffer  
168 containing protease inhibitors (Roche, Nutley, NJ, USA). Equal quantities of



169 protein were fractionated by a 10% sodium dodecyl sulfate-polyacrylamide gel  
170 (SDS-PAGE) and transferred to a nitrocellulose membranes (Millipore,  
171 Billerica, MA, USA). After being blocked in 5% skimmed milk in Tris-based  
172 saline with Tween 20 (TBST) for 1 h at room temperature, the membranes  
173 were incubated with primary antibodies against LC3-II (1:1000, Abcam,  
174 Cambridge, UK), LC3-I (1:1000, Abcam), p62 (1:2000, Cell Signaling  
175 Technology, Danvers, MA, USA). After washing with TBST, the membranes  
176 were incubated with HRP-conjugated secondary antibody for 2 h at room  
177 temperature. The protein bands were visualized using a chemiluminescence  
178 kit (GE Healthcare, Buckinghamshire, UK) and protein intensity was quantified  
179 with Image-Pro Plus 6.0 software (GE Healthcare).

#### 180 *2.5. Flow cytometry analysis*

181 Cell apoptosis was assessed using a FITC-Annexin V Apoptosis Detection Kit  
182 (BD Bioscience, San Jose, CA, USA). HAECs were seeded into 24-well plates  
183 and exposed to ox-LDL at a series of concentration (0.25, 0.5, and 1 mg/L) for  
184 24 h, or transfected with si-NC, si-GAS5, si-GAS5 + anti-miR-NC, si-GAS5 +  
185 anti-miR-26a, followed by stimulation with 1 mg/L ox-LDL. Then cells were  
186 collected and digested using 0.25% trypsin. After washed twice with ice-cold  
187 PBS, cells were resuspended with 500  $\mu$ l of 1  $\times$  binding buffer solution and  
188 incubated with 5  $\mu$ l of Annexin-V FITC and 5  $\mu$ l propidium iodide (PI) for 15 min  
189 in the dark. Apoptotic cells were measured by a BD FACSCalibur flow  
190 cytometer (Beckman Coulter, Fullerton, CA, USA) and analyzed with FlowJo  
191 software (TreeStar, Ashland, OR, USA).

#### 192 *2.6. Luciferase reporter assay*

193 The wild-type fragment of GAS5 including the miR-26a binding sites and its  
194 mutant sequence were subcloned into psiCHECK-2 luciferase reporter vector  
195 (Promega, Madison, WI, USA) and named as GAS5-WT and GAS-MUT. For  
196 luciferase reporter assay, HAECs were cotransfected with 100 ng constructed  
197 luciferase reporter vectors, together with 20 ng Renilla luciferase vector, and  
198 100 nM miR-26a or miR-NC using Lipofectamine 2000 (Invitrogen), followed  
199 by treatment with 1 mg/L ox-LDL. At a point of 48 h transfection, cells were  
200 harvested and the luciferase activity was detected using the dual-Luciferase  
201 Reporter Assay System (Promega). The relative luciferase activity was  
202 normalized to the Renilla luciferase activity.

### 203 *2.7. RNA immunoprecipitation (RIP) assay*

204 Magna RIP<sup>TM</sup> RNA-Binding Protein Immunoprecipitation Kit (Millipore, Bedford,  
205 MA, USA) was used to perform RIP assay was conducted using the. Briefly,  
206 ox-LDL-treated HAECs at 80-90% confluence were collected and lysed in  
207 complete RIP lysis buffer. Next, the supernatant from cell lysates was  
208 harvested by centrifugation and then 100 µl of cell extracts were incubated  
209 with RIP buffer containing A + G magnetic beads conjugated with human  
210 anti-Argonaute2 (Ago2) antibody (Abcam) or corresponding negative control  
211 IgG (Abcam). To remove the non-specific binding, the Sepharose beads were  
212 incubated with Proteinase K to digest the protein and subsequently the  
213 precipitated RNA was isolated by TRIzol reagent (Invitrogen). The purified  
214 RNA was subjected to qRT-PCR analysis.

### 215 *2.8. RNA pull-down assay with biotinylated GAS5*

216 Briefly, biotinylated DNA probe complementary to GAS5 was amplified by PCR  
217 with a T7-containing primer and cloned into the plasmid vector GV394

218 (Genechem, Shanghai, China). The resultant plasmids were linearized with  
219 *Xho*I. Biotin-labeled RNAs were then reversely transcribed with the Biotin RNA  
220 Labeling Mix (Roche, Indianapolis, IN, USA) and T7 RNA polymerase (Roche),  
221 treated with RNase-free DNase I (Roche) and purified with the RNeasy Mini Kit  
222 (Qiagen, Inc., Valencia, CA, USA). The bound RNAs were extracted for further  
223 evaluation by qRT-PCR analysis.

#### 224 *2.9. RNA pull-down assay with biotinylated miR-26a*

225 Biotinylated miR-26a (bio-miR-26a-WT), biotinylated mutant  
226 (bio-miR-26a-MUT), and biotinylated NC (bio-NC) were synthesized by  
227 GenePharma (Shanghai, China). HAECs were transfected with biotinylated  
228 miRNA using Lipofectamine 2000 (Invitrogen) and collected at 48  
229 post-transfection. Cell lysates were incubated with M-280 streptavidin  
230 magnetic beads (Invitrogen). The bound RNAs were purified using TRIZOL  
231 reagent (Invitrogen) for further qRT-PCR analysis.

#### 232 *2.10. Statistical analysis*

233 The data are presented as the mean  $\pm$  standard deviation (SD). All statistical  
234 analyses were performed using SPSS 17.0 software (SPSS, Chicago, IL,  
235 USA). The significance of differences was estimated by Student's *t* test or  
236 one-way analysis of variance (ANOVA). Differences were considered to be  
237 statistically significant when *P* value < 0.05.

### 238 **3. Results**

239 *3.1. GAS5 expression was upregulated and miR-26a was downregulated in*  
240 *the plasma samples of patients with atherosclerosis and ox-LDL-treated*  
241 *HAECs*

242 The expressions of GAS5 and miR-26a in the plasma samples from  
243 atherosclerotic patients and healthy controls were firstly detected by qRT-PCR.  
244 The results indicated that GAS5 expression was abnormally higher while  
245 miR-26a expression was aberrantly lower in the plasma samples from patients  
246 with atherosclerosis compared with that from healthy controls (Fig. 1A and 1B).  
247 Next, we further analyzed the expressions of GAS5 and miR-26a in HAECs  
248 treated with different concentrations of ox-LDL (0.25, 0.5, and 1 mg/L).  
249 qRT-PCR analysis demonstrated that ox-LDL stimulation dose-dependently  
250 increased GAS5 expression and decreased miR-26a expression in HAECs  
251 (Fig. 1C and 1D). Collectively, these data suggested that abnormally  
252 expressed GAS5 and miR-26a may be associated with the development of  
253 atherosclerosis.

### 254 *3.2. The relationship between GAS5 and miR-26a expression in* 255 *ox-LDL-treated HAECs*

256 To address the interaction between GAS5 and miR-26a, HAECs were  
257 transfected with GAS5, si-GAS5, miR-26a, anti-miR-26a, or respective  
258 controls, followed by ox-LDL stimulation. We found that GAS5 expression was  
259 strikingly elevated by GAS5 transfection and greatly reduced by si-GAS5  
260 introduction in ox-LDL-treated HAECs (Fig. 2A). However, ox-LDL-treated  
261 HAECs transfected with GAS5 showed a remarkable decline of miR-26a  
262 expression and ox-LDL-treated HAECs introduced with si-GAS5 exhibited a  
263 substantial enhancement of miR-26a expression (Fig. 2B). Besides, miR-26a  
264 expression was considerably enhanced following transfection of miR-26a but  
265 dramatically reduced after treatment with anti-miR-26a in ox-LDL-treated  
266 HAECs (Fig. 2C). On the contrary, GAS5 expression was obviously lowered in

267 HAECs treated with miR-26a and ox-LDL but evidently augmented in HAECs  
268 treated with anti-miR-26a and ox-LDL (Fig. 2D). Together, these findings  
269 uncovered that there was reciprocal inhibition between GAS5 and miR-26a  
270 expressions in ox-LDL-treated HAECs.

### 271 3.3. GAS5 directly interacted with miR-26a in ox-LDL-treated HAECs

272 Based on the reciprocal repression between GAS5 and miR-26a expression,  
273 we guessed whether the crosstalk between GAS5 and miR-26a is through  
274 direct interaction. Accordingly, bioinformatics analyses were performed to  
275 predict the potential miRNAs for GAS5. As a result, the prediction showed the  
276 potential binding sites for miR-26a on GAS5, as displayed in Fig. 3A. To verify  
277 whether GAS5 could directly interact with miR-26a, we cloned the wild-type or  
278 mutated fragment of GAS5 into psiCHECK-2 luciferase reporter vector and  
279 performed luciferase reporter assay. The results manifested that  
280 cotransfection with GAS5-WT and miR-26a significantly decreased the  
281 luciferase activity, but cotransfection with GAS5-MUT and miR-26a did not  
282 affect the luciferase activity in ox-LDL-stimulated HAECs (Fig. 3B). It is  
283 reported that miRNAs exerted their gene silencing functions via binding to  
284 Ago2, a core component of the RNA-induced silencing complex (RISC) [20].  
285 Then RIP assay was performed in cell extracts from HAECs treated with  
286 utilizing the antibody against Ago2 and the results presented that GAS5 and  
287 miR-26a were both preferentially enriched in Ago2 pellets compared with  
288 control IgG immunoprecipitates (Fig. 3C). To confirm whether miR-26a could  
289 directly interact with GAS5, we applied a biotin-labeled miRNA pull down to  
290 capture GAS5 using M-280 streptavidin magnetic beads from HAECs  
291 transfected with biotinylated miR-26a and the results suggested that GAS5

292 was pulled down as analyzed by qRT-PCR, while miR-26a-MUT with mutant  
293 binding sites of GAS5 led to the inability of miR-26a to pull down GAS5 (Fig.  
294 3D). Also, we used the opposite pull down system to confirm whether GAS5  
295 could pull down miR-26a using a biotin-labeled specific GAS5 probe. We  
296 observed a significant amount of miR-26a in the GAS5 pulled down pellet  
297 compared with control group as analyzed by qRT-PCR (Fig. 3D). These results  
298 demonstrated that GAS5 could directly bind to miR-26a in ox-LDL-treated  
299 HAECs.

#### 300 *3.4. ox-LDL administration induced apoptosis and impaired autophagy flux in* 301 *HAECs*

302 Next, we analyzed the effects of ox-LDL on the apoptosis of HAECs. HAECs  
303 were treated with different concentrations of ox-LDL (0.25, 0.5, and 1 mg/L)  
304 and then flow cytometry analysis was conducted. As shown in Fig. 4A, the  
305 percentage of apoptotic rate was specifically increased following ox-LDL  
306 treatment in a dose-dependent manner. Moreover, we further evaluated the  
307 influence of ox-LDL on the autophagy flux in HAECs by detecting the protein  
308 levels of autophagy markers LC3 and p62. The western blot analysis indicated  
309 that the LC3-II/LC3-I ratio was distinctly decreased while p62 expression was  
310 notably increased in ox-LDL-treated HAECs dose-dependently, suggesting  
311 that ox-LDL induced impaired autophagy flux in HAECs (Fig 4B). Taken  
312 together, these results demonstrated that ox-LDL administration induced  
313 apoptosis and weakened autophagy in HAECs.

#### 314 *3.5. GAS5 knockdown restored ox-LDL-induced impaired autophagy flux by* 315 *upregulating miR-26a in HAECs*

316 To figure out the effects of GAS5 or combined with miR-26a on  
317 ox-LDL-induced impaired autophagy flux, HAECs were transfected with  
318 si-GAS5, si-NC, si-GAS5 + anti-miR-26a, si-GAS5 + anti-miR-NC, and then  
319 exposed to 1 mg/L ox-LDL. Flow cytometry analysis proved that silencing of  
320 GAS5 effectively suppressed ox-LDL-induced apoptosis in HAECs, which was  
321 partially recuperated by inhibition of miR-26a (Fig. 5A). The subsequent  
322 western blot analysis displayed that transfection with si-GAS5 obviously  
323 boosted the LC3-II/LC3-I ratio and reduced p62 level in ox-LDL-treated HAECs  
324 (Fig. 5B). However, these effects were significantly reversed by anti-miR-26a  
325 treatment (Fig. 5B), suggesting that miR-26a suppression attenuated GAS5  
326 knockdown-mediated restoration of ox-LDL-induced impaired autophagy flux  
327 in HAECs. These results manifested that GAS5 knockdown restored  
328 ox-LDL-induced impaired autophagy flux by upregulating miR-26a in HAECs.

#### 329 **4. Discussion**

330 In the present study, we demonstrated that GAS5 was upregulated and  
331 miR-26a was downregulated in the plasma samples of patients with  
332 atherosclerosis and ox-LDL-treated HAECs. Our study demonstrated that  
333 GAS5 directly interacted with miR-26a in ox-LDL-treated HAECs.  
334 Mechanistically, GAS5 knockdown restored ox-LDL-induced impaired  
335 autophagy flux by upregulating miR-26a in HAECs. Thus, GAS5 intervention  
336 may be a promising strategy to prevent atherosclerosis.

337 Dysregulation of autophagy has been documented to be closely  
338 associated with many diseases, including cardiovascular disease [21].  
339 Autophagy is well-known to become dysfunctional in atherosclerosis,  
340 suggesting its protective role. It has been shown that the protective effect on

341 autophagy might be beneficial to the therapy of atherosclerosis [22]. Recent  
342 studies showed that ox-LDL could induce vascular EC autophagy dysfunction  
343 and apoptosis in apoE<sup>-/-</sup> mice [23]. Accordingly, we used ox-LDL to treat ECs  
344 and VSMCs to stimulate the pathological changes that occur during the early  
345 stage of atherosclerosis. During autophagy process, a cytosolic form of LC3  
346 (LC3-I) is conjugated to form LC3-phosphatidylethanolamine conjugate (LC3-II)  
347 to promote autophagosome formation [24]. Thus, the ratio of LC3-II to LC3-I is  
348 considered as a marker for monitoring autophagy activity [25]. Additionally,  
349 p62, known as an autophagic substrate, is used as another widely marker of  
350 autophagy flux and can be selectively degraded by autophagy [26]. In our  
351 study, we found that ox-LDL stimulation induced apoptosis and impaired  
352 autophagy flux in HAECs, as demonstrated by the reduced ratio of  
353 LC3-II/LC3-I and increased expression of p62, which was consistent with the  
354 previous studies [27-29].

355         Recently, substantive studies have shown that ncRNAs including  
356 lncRNAs or miRNAs are identified as vital regulator of the physiological  
357 process of atherosclerosis [30]. For example, it was revealed that thymic  
358 stromal lymphopoietin (TSLP)-induced activation of lncRNA HOTAIR played a  
359 protective role in ox-LDL-induced EC injury by facilitating cell proliferation and  
360 migration and suppressing apoptosis in ECs [31]. In addition, miR-126 was  
361 reported to alleviate EC injury in atherosclerosis by restoring autophagic flux  
362 via inhibiting of PI3K/Akt/mTOR [32]. Recently, ample evidence has suggested  
363 that lncRNAs suppress the expressions and biological functions of miRNAs by  
364 acting as a ceRNA [33]. For example, it was demonstrated that silencing of  
365 H19 inhibited lipid accumulation and inflammation response in ox-LDL-treated



366 Raw264.7 cells by upregulating miR-130b [34]. LncRNA H19 expression was  
367 found to be increased in atherosclerotic patient serum and ox-LDL-stimulated  
368 human aorta vascular smooth muscle cells (HA-VSMCs), and knockdown of  
369 H19 suppressed proliferation and induced apoptosis in ox-LDL-induced  
370 HA-VSMCs through modulating WNT/ $\beta$ -catenin signaling [35]. LncRNA MEG3  
371 expression was reported to be downregulated in coronary artery disease (CAD)  
372 tissues than in normal arterial tissues, and ectopic expression of MEG3  
373 increased EC proliferation and migration through inhibiting miR-21 expression  
374 [36].

375 In our study, we demonstrated that GAS5 was significantly upregulated  
376 and miR-26a was remarkably downregulated in the plasma samples of  
377 patients with atherosclerosis and ox-LDL-treated HAECs, which was in  
378 accordance with the previous studies [11, 12, 16, 17]. Given the inverse  
379 expression changes between GAS5 and miR-26a in atherosclerosis, we  
380 focused on the interaction between GAS5 and miR-26a. Luciferase reporter  
381 assay, RIP and RNA pull down manifested that GAS5 could directly interact  
382 with miR-26a by functioning as a ceRNA in ox-LDL-treated HAECs.  
383 Furthermore, rescue experiments demonstrated that we found that GAS5  
384 knockdown alleviated ox-LDL-induced apoptosis and restored ox-LDL-induced  
385 impaired autophagy flux in HAECs by upregulating miR-26a.

## 386 **5. Conclusions**

387 In summary, our study provided the evidence that GAS5 knockdown  
388 restored ox-LDL-induced impaired autophagy flux by upregulating miR-26a in  
389 HAECs, revealing a novel regulatory mechanism for ox-LDL-induced impaired  
390 autophagy flux in ECs through ceRNA crosstalk. GAS5/miR-26a axis may

391 extend our knowledge of the pathological mechanism of atherosclerosis and  
392 provided the potential therapeutic target for the treatment of atherosclerosis.

393

#### 394 **Author Contributions**

395 This work was designed and conceived by Weijie Liang. The experiment  
396 procedures and data analysis were carried out by Taibing Fan and Lin Liu. The  
397 manuscript was prepared by Weijie Liang and Lianzhong Zhang.

398

#### 399 **Conflicts of interest**

400 The authors have no conflict of interest to declare.

401

#### 402 **Acknowledgements**

403 Not applicable

404

405

406 **References**

407

408 1. Chen KC, Juo SH. MicroRNAs in atherosclerosis. *Kaohsiung J Med Sci.*

409 2012;28:631-40.

410 2. Cahill PA, Redmond EM. Vascular endothelium - Gatekeeper of vessel

411 health. *Atherosclerosis.* 2016;248:97-109.

412 3. Trpkovic A, Resanovic I, Stanimirovic J, Radak D, Mousa SA,

413 Cenic-Milosevic D, et al. Oxidized low-density lipoprotein as a biomarker of

414 cardiovascular diseases. *Crit Rev Clin Lab Sci.* 2015;52:70-85.

415 4. Bravo-San Pedro JM, Kroemer G, Galluzzi L. Autophagy and mitophagy in

416 cardiovascular disease. *Circ Res.* 2017;120:1812-24.

417 5. Aburto MR, Hurle JM, Varela-Nieto I, Magarinos M. Autophagy during

418 vertebrate development. *Cells.* 2012;1:428-48.

419 6. Li W, Sultana N, Siraj N, Ward LJ, Pawlik M, Levy E, et al. Autophagy

420 dysfunction and regulatory cystatin C in macrophage death of

421 atherosclerosis. *J Cell Mol Med.* 2016;20:1664-72.

422 7. Previdi MC, Carotenuto P, Zito D, Pandolfo R, Braconi C. Noncoding

423 RNAs as novel biomarkers in pancreatic cancer: what do we know? *Future*

424 *Oncol.* 2017;13:443-53.

425 8. Zhou T, Ding JW, Wang XA, Zheng XX. Long noncoding RNAs and

426 atherosclerosis. *Atherosclerosis.* 2016;248:51-61.

427 9. Schneider C, King RM, Philipson L. Genes specifically expressed at

428 growth arrest of mammalian cells. *Cell.* 1988;54:787-93.

429 10. Pickard MR, Williams GT. Molecular and cellular mechanisms of action of

430 tumour suppressor GAS5 lncRNA. *Genes (Basel).* 2015;6:484-99.

- 431 11. Chen L, Yang W, Guo Y, Chen W, Zheng P, Zeng J, et al. Exosomal  
432 lncRNA GAS5 regulates the apoptosis of macrophages and vascular  
433 endothelial cells in atherosclerosis. 2017;12:e0185406.
- 434 12. Chen L, Yao H, Hui JY, Ding SH, Fan YL, Pan YH, et al. Global  
435 transcriptomic study of atherosclerosis development in rats. *Gene*.  
436 2016;592:43-8.
- 437 [13. Sun X, Belkin N, Feinberg MW. Endothelial microRNAs and  
438 atherosclerosis. *Curr Atheroscler Rep*. 2013;15:372.
- 439 14. Zhang ZH, Li J, Liu BR, Luo CF, Dong Q, Zhao LN, et al. MicroRNA-26  
440 was decreased in rat cardiac hypertrophy model and may be a promising  
441 therapeutic target. *J Cardiovasc Pharmacol*. 2013;62:312-9.
- 442 15. Suh JH, Choi E, Cha MJ, Song BW, Ham O, Lee SY, et al. Up-regulation  
443 of miR-26a promotes apoptosis of hypoxic rat neonatal cardiomyocytes by  
444 repressing GSK-3beta protein expression. *Biochem Biophys Res Commun*.  
445 2012;423:404-10.
- 446 16. Zhang Y, Qin W, Zhang L, Wu X, Du N, Hu Y, et al. MicroRNA-26a  
447 prevents endothelial cell apoptosis by directly targeting TRPC6 in the  
448 setting of atherosclerosis. *Sci Rep*. 2015;5:9401.
- 449 17. Feng M, Xu D, Wang L. miR-26a inhibits atherosclerosis progression by  
450 targeting TRPC3. *Cell Biosci*. 2018;8:4.
- 451 18. Batista PJ, Chang HY. Long noncoding RNAs: cellular address codes in  
452 development and disease. *Cell*. 2013;152:1298-307.
- 453 19. Ballantyne MD, McDonald RA, Baker AH. lncRNA/MicroRNA interactions  
454 in the vasculature. *Clin Pharmacol Ther*. 2016;99:494-501.

- 455 20. Wee LM, Flores-Jasso CF, Salomon WE, Zamore PD. Argonaute divides  
456 its RNA guide into domains with distinct functions and RNA-binding  
457 properties. *Cell*. 2012;151:1055-67.
- 458 21. Nemchenko A, Chiong M, Turer A, Lavandero S, Hill JA. Autophagy as a  
459 therapeutic target in cardiovascular disease. *J Mol Cell Cardiol*.  
460 2011;51:584-93.
- 461 22. Che J, Liang B, Zhang Y, Wang Y, Tang J, Shi G. Kaempferol alleviates  
462 ox-LDL-induced apoptosis by up-regulation of autophagy via inhibiting  
463 PI3K/Akt/mTOR pathway in human endothelial cells. *Cardiovasc Pathol*.  
464 2017;31:57-62.
- 465 23. Peng N, Meng N, Wang S, Zhao F, Zhao J, Su L, et al. An activator of  
466 mTOR inhibits oxLDL-induced autophagy and apoptosis in vascular  
467 endothelial cells and restricts atherosclerosis in apolipoprotein E(-)/(-) mice.  
468 *Sci Rep*. 2014;4:5519.
- 469 24. Huang R, Liu W. Identifying an essential role of nuclear LC3 for autophagy.  
470 *Autophagy*. 2015;11:852-3.
- 471 25. McLeland CB, Rodriguez J, Stern ST. Autophagy monitoring assay:  
472 qualitative analysis of MAP LC3-I to II conversion by immunoblot. *Methods*  
473 *Mol Biol*. 2011;697:199-206.
- 474 26. Pankiv S, Clausen TH, Lamark T, Brech A, Bruun JA, Outzen H, et al.  
475 p62/SQSTM1 binds directly to Atg8/LC3 to facilitate degradation of  
476 ubiquitinated protein aggregates by autophagy. *J Biol Chem*.  
477 2007;282:24131-45.

- 478 27. Yang X, Wei J, He Y, Jing T, Li Y, Xiao Y, et al. SIRT1 inhibition promotes  
479 atherosclerosis through impaired autophagy. *Oncotarget*.  
480 2017;8:51447-61.
- 481 28. Geng Z, Xu F, Zhang Y. MiR-129-5p-mediated Beclin-1 suppression  
482 inhibits endothelial cell autophagy in atherosclerosis. *Am J Transl Res*.  
483 2016;8:1886-94.
- 484 29. Gu HF, Li HZ, Tang YL, Tang XQ, Zheng XL, Liao DF. Nicotinate-Curcumin  
485 Impedes Foam Cell Formation from THP-1 Cells through Restoring  
486 Autophagy Flux. *PLoS One*. 2016;11:e0154820.
- 487 30. Aryal B, Rotllan N, Fernandez-Hernando C. Noncoding RNAs and  
488 atherosclerosis. *Curr Atheroscler Rep*. 2014;16:407.
- 489 31. Peng Y, Meng K, Jiang L, Zhong Y, Yang Y, Lan Y, et al. Thymic stromal  
490 lymphopietin-induced HOTAIR activation promotes endothelial cell  
491 proliferation and migration in atherosclerosis. *Biosci Rep*. 2017;37.
- 492 32. Tang F, Yang TL. MicroRNA-126 alleviates endothelial cells injury in  
493 atherosclerosis by restoring autophagic flux via inhibiting of  
494 PI3K/Akt/mTOR pathway. *Biochem Biophys Res Commun*.  
495 2018;495:1482-9.
- 496 33. Cesana M, Cacchiarelli D, Legnini I, Santini T, Sthandier O, Chinappi M, et  
497 al. A long noncoding RNA controls muscle differentiation by functioning as  
498 a competing endogenous RNA. *Cell*. 2011;147:358-69.
- 499 34. Han Y, Ma J, Wang J, Wang L. Silencing of H19 inhibits the adipogenesis  
500 and inflammation response in ox-LDL-treated Raw264.7 cells by  
501 up-regulating miR-130b. *Mol Immunol*. 2018;93:107-14.

502 35.Zhang L, Cheng H, Yue Y, Li S, Zhang D, He R. H19 knockdown  
503 suppresses proliferation and induces apoptosis by regulating  
504 miR-148b/WNT/beta-catenin in ox-LDL -stimulated vascular smooth  
505 muscle cells. J Biomed Sci. 2018;25:11.

506 36.Wu Z, He Y, Li D, Fang X, Shang T, Zhang H, et al. Long noncoding RNA  
507 MEG3 suppressed endothelial cell proliferation and migration through  
508 regulating miR-21. Am J Transl Res. 2017;9:3326-35.

509

510 **Figure legends**

511

512 **Figure 1.** GAS5 expression was upregulated and miR-26a was downregulated

513 in the plasma samples of patients with atherosclerosis and ox-LDL-treated

514 HAECs. qRT-PCR analysis of GAS5 (A) and miR-26a (B) in the plasma

515 samples from patients with atherosclerosis and healthy subjects. qRT-PCR

516 analysis of GAS5 (C) and miR-26a (D) in the HAECs treated with different

517 doses of ox-LDL (0.25, 0.5, and 1 mg/L) for 24 h. \* $P < 0.05$ .

518 **Figure 2.** The relationship between GAS5 and miR-26a expression in

519 ox-LDL-treated HAECs. (A and B) The expressions of GAS5 and miR-26a

520 were examined by qRT-PCR in HAECs after transfection with GAS5, si-GAS5,

521 or corresponding controls, followed by administration with 1 mg/L ox-LDL for

522 24 h. (C and D) The expressions of GAS5 and miR-26a were examined by

523 qRT-PCR in HAECs after introduction with miR-26a, anti-miR-26a, or matched

524 controls, followed by administration with 1 mg/L ox-LDL for 24 h. \* $P < 0.05$ .

525 **Figure 3.** GAS5 directly interacted with miR-26a in ox-LDL-treated HAECs. (A)

526 Predict binding sites between GAS5 and miR-26a. (B) Luciferase reporter

527 assay was performed to detect the luciferase activity in HAECs after

528 cotransfection with GAS5-WT or GAS5-MUT and miR-26a or miR-NC,

529 followed by treatment with ox-LDL. (C) Anti-Ago2 RIP assay was performed in

530 cellular lysates from HAECs treated with ox-LDL to explore the association

531 between GAS5 and miR-26a.

532 (D) HAECs were transfected with biotinylated miR-26a (bio-miR-26a-WT),

533 biotinylated mutant (bio-miR-26a-MUT), and biotinylated NC (bio-NC),

534 followed by treatment with ox-LDL, and collected at 48 post-transfection for

535 pull-down assay with biotinylated miR-26a. Detection of miR-26a using



536 qRT-PCR in the samples pulled down by biotinylated GAS5 and NC probe. \**P*  
537 < 0.05.

538 **Figure 4.** ox-LDL administration induced apoptosis and weakened autophagy  
539 flux in HAECs. (A) Flow cytometry analysis was performed to assess the  
540 apoptosis of HAECs treated with different concentrations of ox-LDL (0.25, 0.5,  
541 and 1 mg/L). (B) Western blot was conducted to determine the protein levels of  
542 LC3-II, LC3-I and p62 in HAECs treated with different doses of ox-LDL (0.25,  
543 0.5, and 1 mg/L). \**P* < 0.05.

544 **Figure 5.** GAS5 knockdown restored ox-LDL-induced impaired autophagy flux  
545 by upregulating miR-26a in HAECs. HAECs were transfected with si-GAS5,  
546 si-NC, si-GAS5 + anti-miR-26a, si-GAS5 + anti-miR-NC, and then exposed to  
547 1 mg/L ox-LDL for 24 h. (A) Flow cytometry analysis was performed to detect  
548 apoptosis of the treated HAECs. (B) Western blot was used to analyze the  
549 protein levels of LC3-II, LC3-I and p62 in the treated HEACs. \**P* < 0.05.

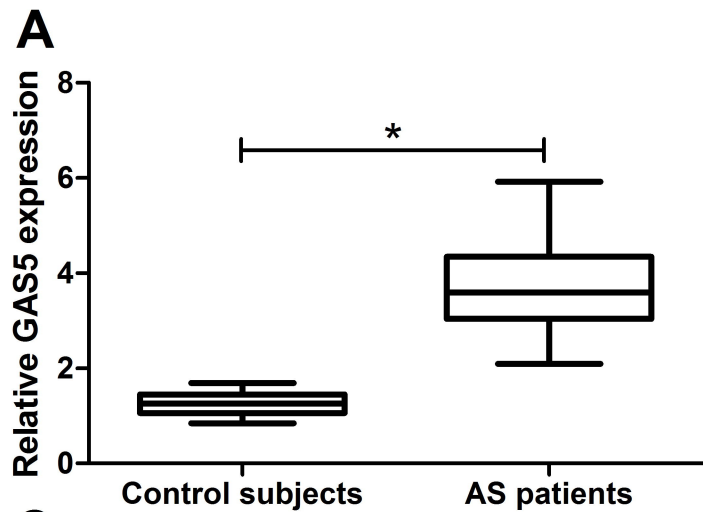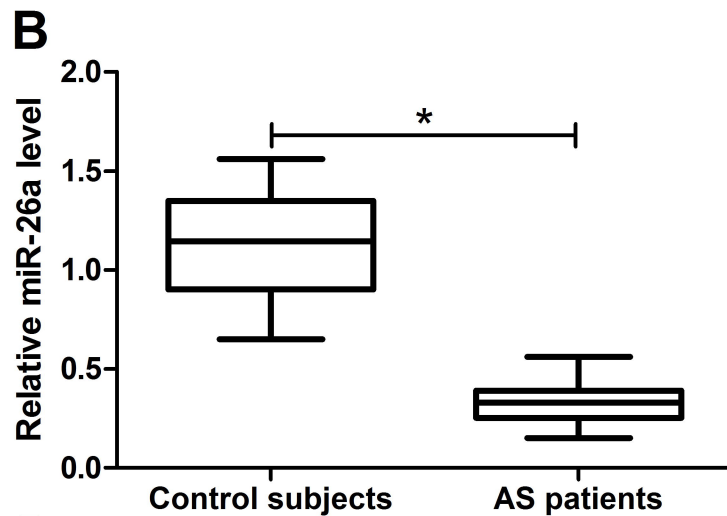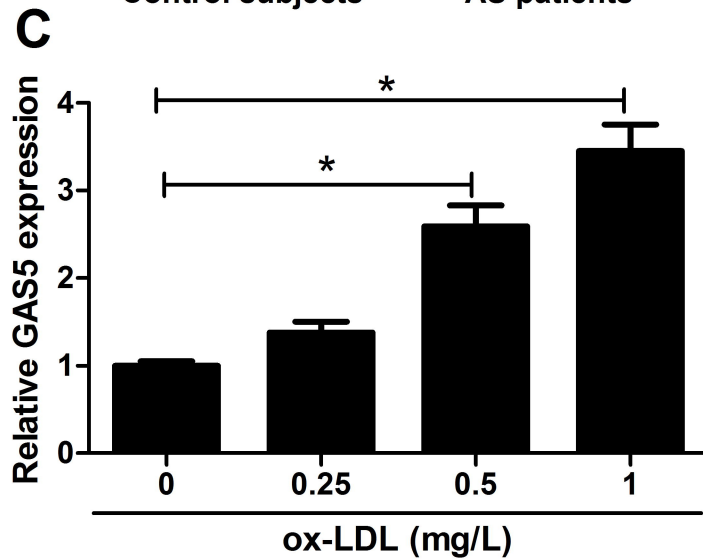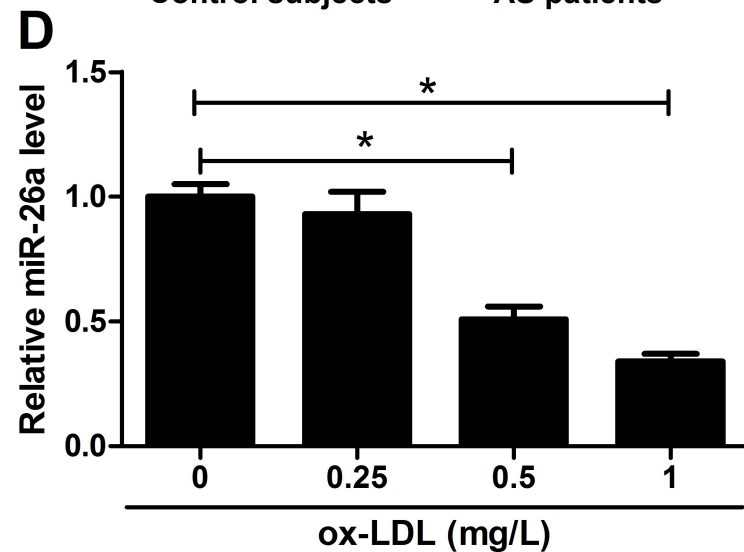

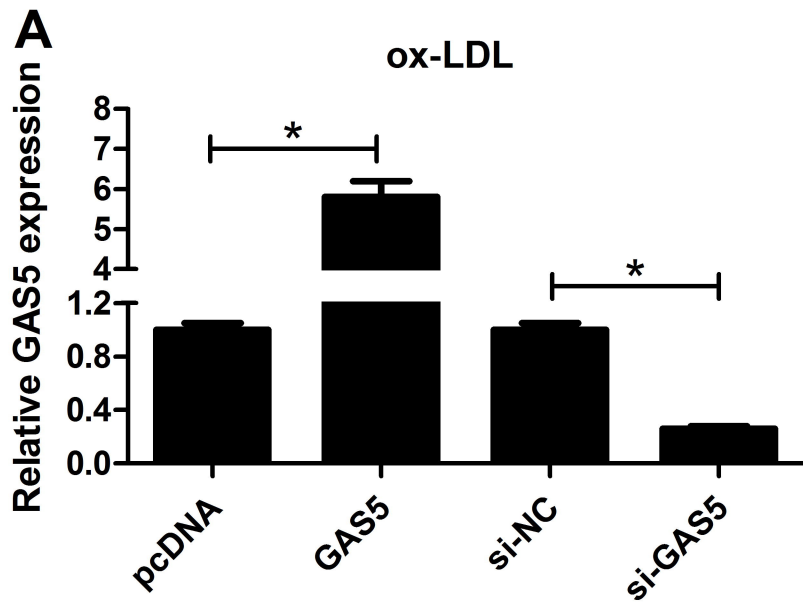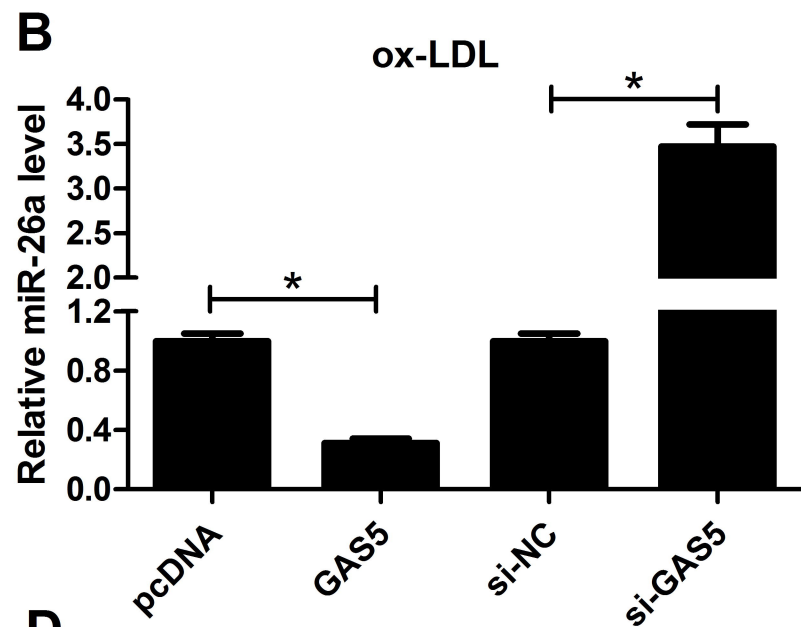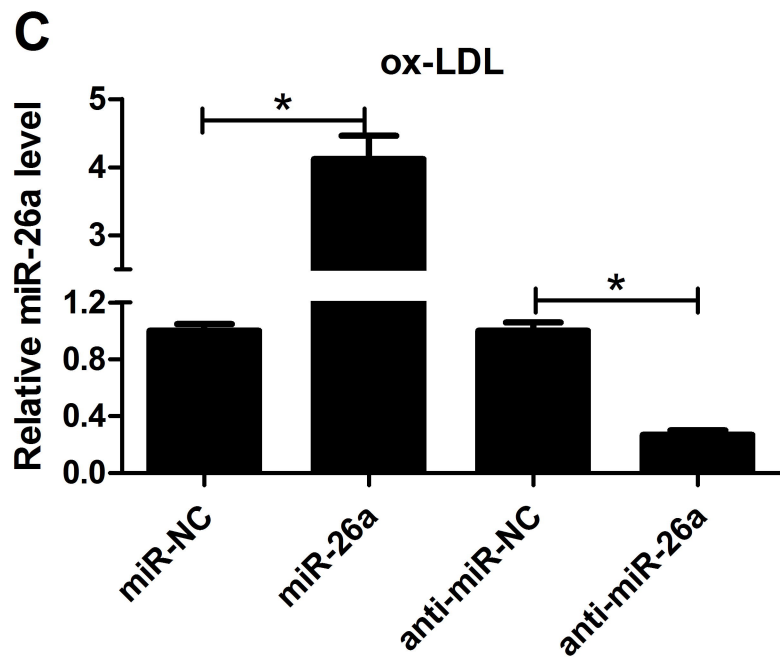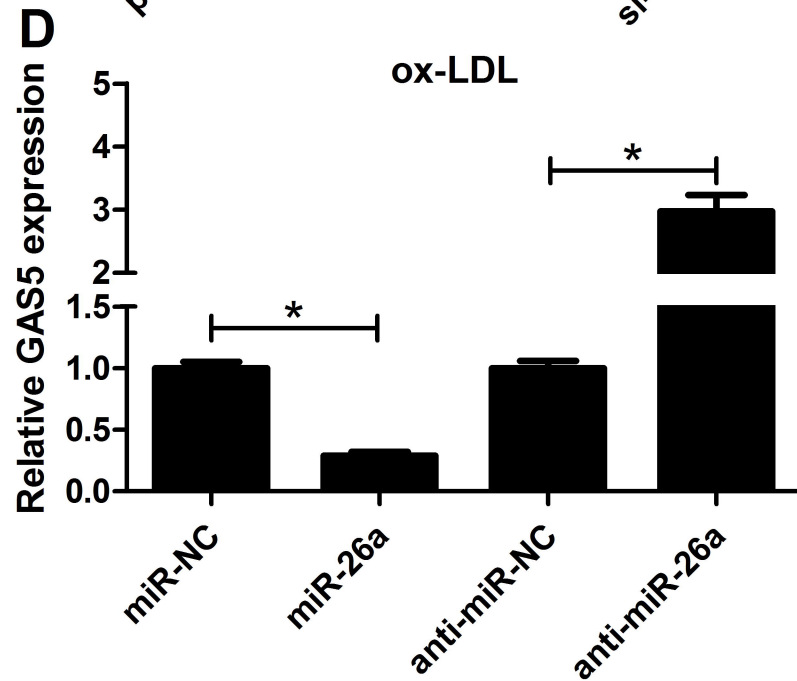

**A** Position: chr1:173833309-173833315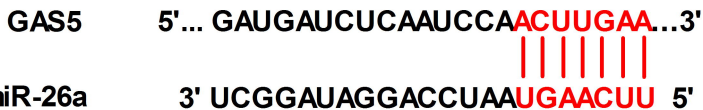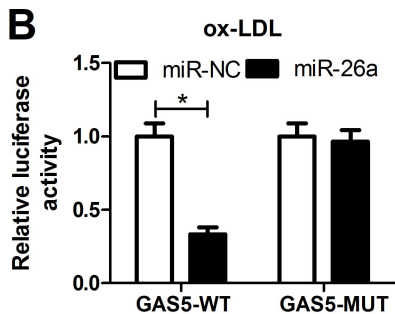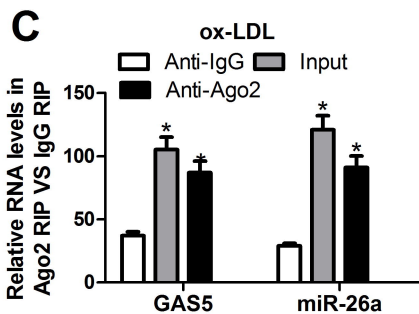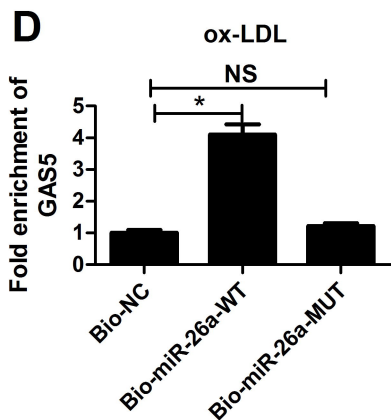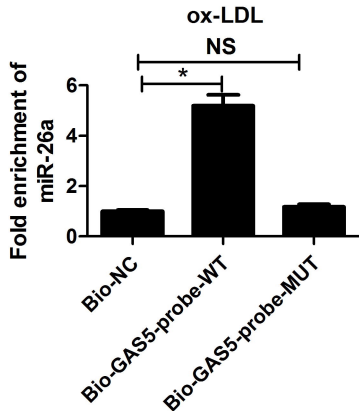

**A**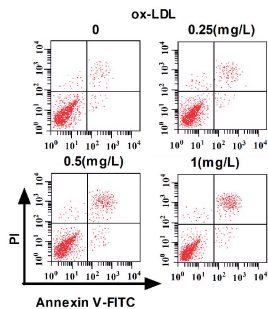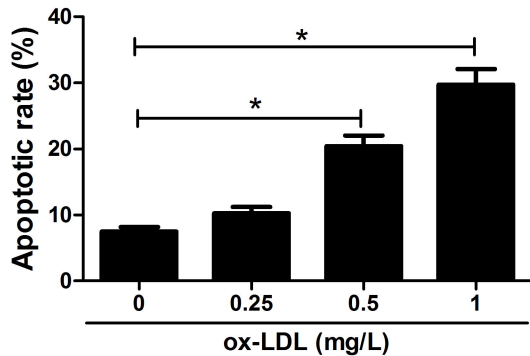**B**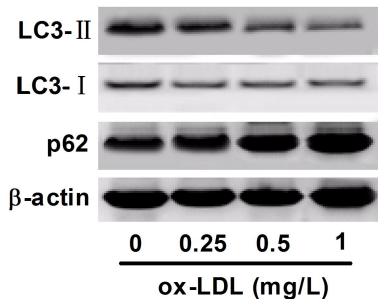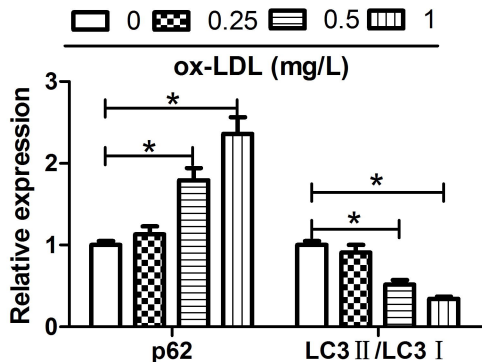

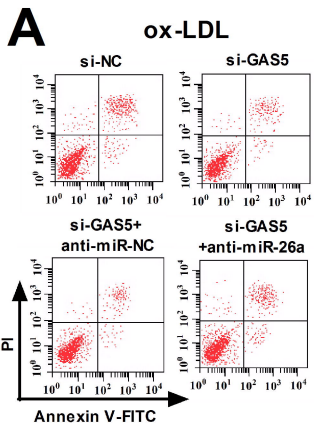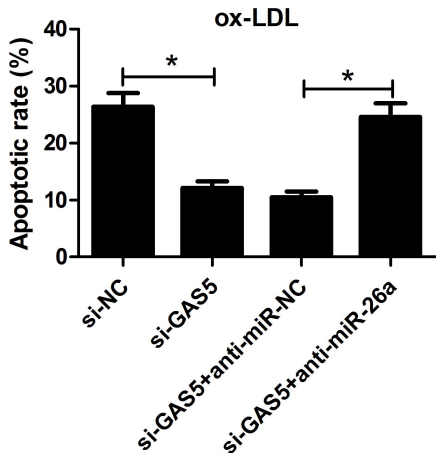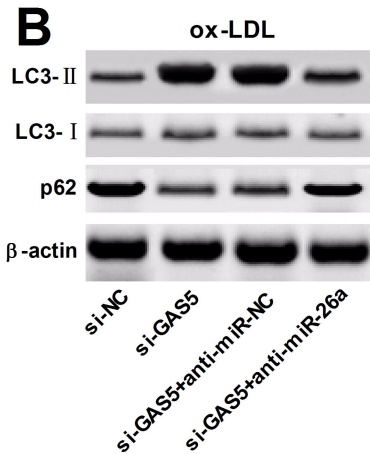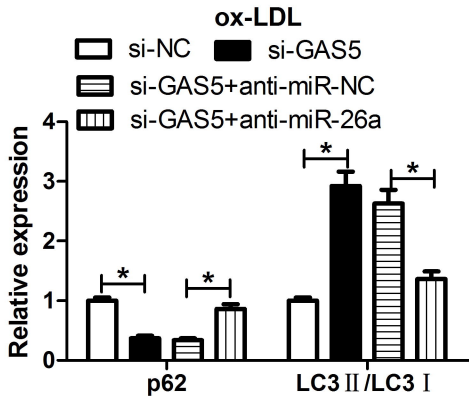

Source: https://www.biorxiv.org/content/10.1101/293324v1.full.pdf
